# Supplementary material
Source: publisher site journal article supplement (https://www.dovepress.com/article/502451)

**Figure S1:** Goodness of fit of multivariate logistic regression prediction model in men


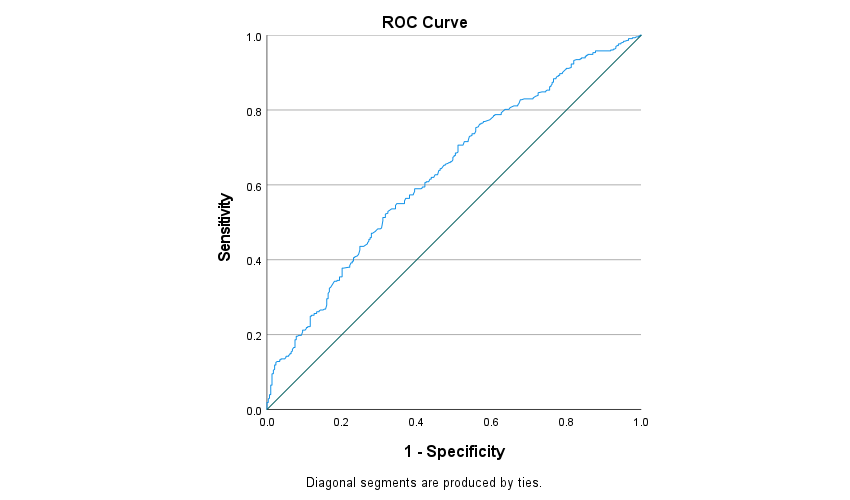


**Figure S2:** Goodness of fit of multivariate logistic regression prediction model in women


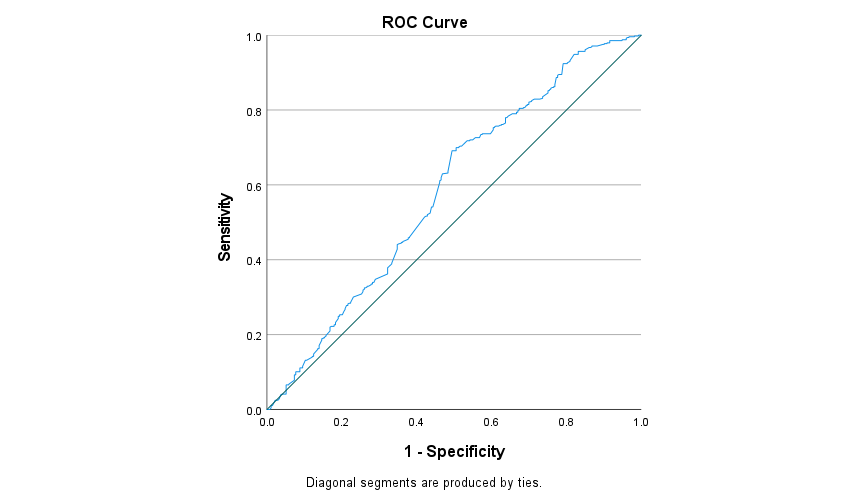

Supplement: Supplementary file 1 [file get_supplementary_file.php]
